# Supplementary material
Source: MDPI journal article supplement (https://www.mdpi.com/2073-4441/13/14/1899)
Supplement: s1 [file s1]

*Supplementary Materials*

# Metabarcoding under Brine: Microbial Ecology of Five Hypersaline Lakes at Rottnest Island (WA, Australia)

Mattia Saccò <sup>1,\*</sup>, Nicole E. White <sup>1</sup>, Matthew Campbell <sup>1</sup>, Sebastian Allard <sup>2</sup>, William F. Humphreys <sup>3,4</sup>, Paul Pringle <sup>2</sup>, Farid Sepanta <sup>2</sup>, Alex Laini <sup>5</sup> and Morten E. Allentoft <sup>1,6</sup>

<sup>1</sup> Trace and Environmental DNA (TrEnD) Laboratory, School of Molecular and Life Sciences, Curtin University, Perth, WA 6102, Australia; nicole.white@curtin.edu.au (N.E.W.); matthew.campbell@curtin.edu.au (M.C.); morten.allentoft@curtin.edu.au (M.E.A.)

<sup>2</sup> Curtin Water Quality Research Centre, Curtin University, GPO Box U1987, Perth, WA 6845, Australia; S.Allard@curtin.edu.au (S.A.); p.pringle@exchange.curtin.edu.au (P.P.) farid.sepanta@curtin.edu.au (F.S.)

<sup>3</sup> Collections and Research Centre, Western Australian Museum, Welshpool, WA 6986, Australia; bill.humphreys@museum.wa.gov.au

<sup>4</sup> School of Biological Sciences, University of Western Australia, Crawley, WA 6009, Australia

<sup>5</sup> Department of Life Sciences and Systems Biology, University of Torino, 10124 Torino, Italy; alex.laini@gmail.com

<sup>6</sup> Lundbeck Foundation GeoGenetics Centre, GLOBE Institute, University of Copenhagen, Øster Voldgade 5-7, 1350, Copenhagen, Denmark

\* Correspondence: mattia.sacco@curtin.com.au

**Citation:** Saccò, M.; White, N.E.; Campbell, M.; Allard, S.; Humphreys, W.F.; Pringle, P.; Sepanta, F.; Laini, A.; Allentoft, M.E. Metabarcoding under Brine: Microbial Ecology of Five Hypersaline Lakes at Rottnest Island (WA, Australia). *Water* **2021**, *13*, 1899. <https://doi.org/10.3390/w13141899>

Academic Editor: Nickolai Shadrin

Received: 29 May 2021

Accepted: 6 July 2021

Published: 9 July 2021

**Publisher's Note:** MDPI stays neutral with regard to jurisdictional claims in published maps and institutional affiliations.

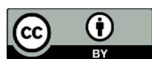

**Copyright:** © 2021 by the authors. Licensee MDPI, Basel, Switzerland. This article is an open access article distributed under the terms and conditions of the Creative Commons Attribution (CC BY) license (<http://creativecommons.org/licenses/by/4.0/>).

**Table S1.** Labels, ID, GPS coordinates (latitude and longitude) per each sampling point considered in the study.

| Lake       | Lake ID | GPS coordinates      | Sample ID  |                   |                  |
|------------|---------|----------------------|------------|-------------------|------------------|
|            |         |                      | Probe data | Water (nutrients) | Water (microbes) |
| Vincent    | VIN     | −31.99972, 115.51444 | VIN_1-PD   | VIN_1-WN          | VIN_1-WM         |
| Garden     | GAR     | −31.99555, 115.53666 | GAR_1-PD   | GAR_1-WN          | GAR_1-WM         |
| Herschel   | HER     | −31.99845, 115.52617 | HER_1-PD   |                   | HER_1-WM         |
|            | HER     | −31.99638, 115.53138 | HER_2-PD   | HER_2-WN          | HER_2-WM         |
| Baghdad    | BAG     | −31.99472, 115.52361 | BAG1-PD    | BAG1-WN           | BAG1-WM          |
|            | BAG     | −31.99714, 115.5187  | BAG2-PD    |                   | BAG2-WM          |
|            | BAG     | −31.99372, 115.51351 | BAG3-PD    |                   | BAG3-WM          |
| Serpentine | SER     | −32.00694, 115.52027 | SER1-PD    | SER1-WN           | SER1-WM          |
|            | SER     | −32.00277, 115.52583 | SER2-PD    |                   | SER2-WM          |
|            | SER     | −32.0018, 115.53046  | SER3-PD    |                   | SER3-WM          |

**Table S2.** Results of the Tukey's HSD tests (pairwise comparisons) on the hydrochemical data across the lakes. \*,  $p < 0.05$ ; \*\*,  $p < 0.005$ ; \*\*\*,  $p < 0.0005$ . DO, Dissolved Oxygen; NH<sub>3</sub>, ammonia; TDS, Total Dis-solved solids; Cl<sup>−</sup>, chloride; Br<sup>−</sup>, bromide; SO<sub>4</sub><sup>2−</sup>, sulphates; DOC, Dissolved Organic Carbon; TN, Total Nitrogen.

|                     | pH  | DO | Temperature | Alkalinity | NH <sub>3</sub> | TDS | Cl <sup>−</sup> | Br <sup>−</sup> | SO <sub>4</sub> <sup>2−</sup> | DOC | TN  |
|---------------------|-----|----|-------------|------------|-----------------|-----|-----------------|-----------------|-------------------------------|-----|-----|
| Garden-Baghdad      | *** | ns | ns          | ns         | *               | *** | ***             | **              | **                            | *** | *** |
| Herschel-Baghdad    | *** | *  | ns          | *          | ns              | *** | ***             | ***             | ***                           | *** | ns  |
| Serpentine-Baghdad  | *** | ns | ***         | **         | ns              | *** | ***             | **              | ***                           | *   | **  |
| Vincent-Baghdad     | *** | ns | ***         | ns         | ns              | ns  | ns              | ns              | **                            | **  | *** |
| Herschel-Garden     | ns  | ns | ns          | **         | **              | *** | ***             | ***             | ***                           | *** | *** |
| Serpentine-Garden   | ns  | ns | ***         | ***        | ns              | *** | ***             | ***             | ***                           | *** | *** |
| Vincent-Garden      | *   | ns | ***         | ns         | *               | *** | ***             | **              | ***                           | *** | *** |
| Serpentine-Herschel | ns  | ns | ***         | ns         | ns              | ns  | **              | ns              | ***                           | *** | *** |
| Vincent-Herschel    | ns  | ns | *           | *          | ns              | *** | ***             | ***             | ***                           | *** | ns  |
| Vincent-Serpentine  | ns  | ns | ns          | **         | ns              | *** | ***             | ***             | ***                           | *** | *** |

**Table S3.** Results of the Tukey's HSD tests (pairwise comparisons) on the values of the diversity indices across the lakes. \*,  $p < 0.05$ ; \*\*,  $p < 0.005$ ; \*\*\*,  $p < 0.0005$ . H, Shannon diversity index; J, Pielou's evenness index.

|                     | $\alpha$ -diversity | H   | J   |
|---------------------|---------------------|-----|-----|
| Garden-Baghdad      | ***                 | *** | *** |
| Herschel-Baghdad    | ***                 | *** | *** |
| Serpentine-Baghdad  | ***                 | *** | *** |
| Vincent-Baghdad     | ns                  | ns  | ns  |
| Herschel-Garden     | ***                 | *** | *** |
| Serpentine-Garden   | ***                 | *** | *** |
| Vincent-Garden      | ***                 | *** | *** |
| Serpentine-Herschel | **                  | ns  | ns  |
| Vincent-Herschel    | ***                 | *** | *** |
| Vincent-Serpentine  | ***                 | *** | *** |

**Table S4.** Lower, medium and upper quantiles (2.5%, 50% and 97.5%) and median of the  $r^2$  values obtained from 1000 random replicates.

| Variable                      | Quantiles |        |        |
|-------------------------------|-----------|--------|--------|
|                               | 2.50%     | 50.00% | 97.50% |
| pH                            | 0.50      | 0.52   | 0.53   |
| DO                            | 0.16      | 0.36   | 0.55   |
| Temp                          | 0.28      | 0.33   | 0.37   |
| Alk                           | 0.78      | 0.85   | 0.90   |
| NH <sub>3</sub>               | 0.27      | 0.36   | 0.48   |
| TDS                           | 0.93      | 0.94   | 0.95   |
| Cl <sup>-</sup>               | 0.94      | 0.95   | 0.95   |
| Br <sup>-</sup>               | 0.90      | 0.92   | 0.94   |
| SO <sub>4</sub> <sup>2-</sup> | 0.03      | 0.03   | 0.03   |
| DOC                           | 0.62      | 0.63   | 0.64   |
| TN                            | 0.70      | 0.73   | 0.76   |

**Table S5.** Results of the Tukey's HSD tests (pairwise comparisons) on the phylogenetic indices across the lakes. \*,  $p < 0.05$ ; \*\*,  $p < 0.005$ ; \*\*\*,  $p < 0.0005$ . PD, phylogenetic diversity; MTD, mean pairwise distance; MNTD, mean nearest taxon distance.

|                     | PD  | MTD | MNTD |
|---------------------|-----|-----|------|
| Garden-Baghdad      | *** | *   | *    |
| Herschel-Baghdad    | *** | *** | ns   |
| Serpentine-Baghdad  | *** | *** | ns   |
| Vincent-Baghdad     | ns  | ns  | ns   |
| Herschel-Garden     | *   | *** | ***  |
| Serpentine-Garden   | *** | *** | ***  |
| Vincent-Garden      | *** | ns  | ***  |
| Serpentine-Herschel | ns  | ns  | ns   |
| Vincent-Herschel    | *** | *** | ns   |
| Vincent-Serpentine  | *** | *** | ns   |

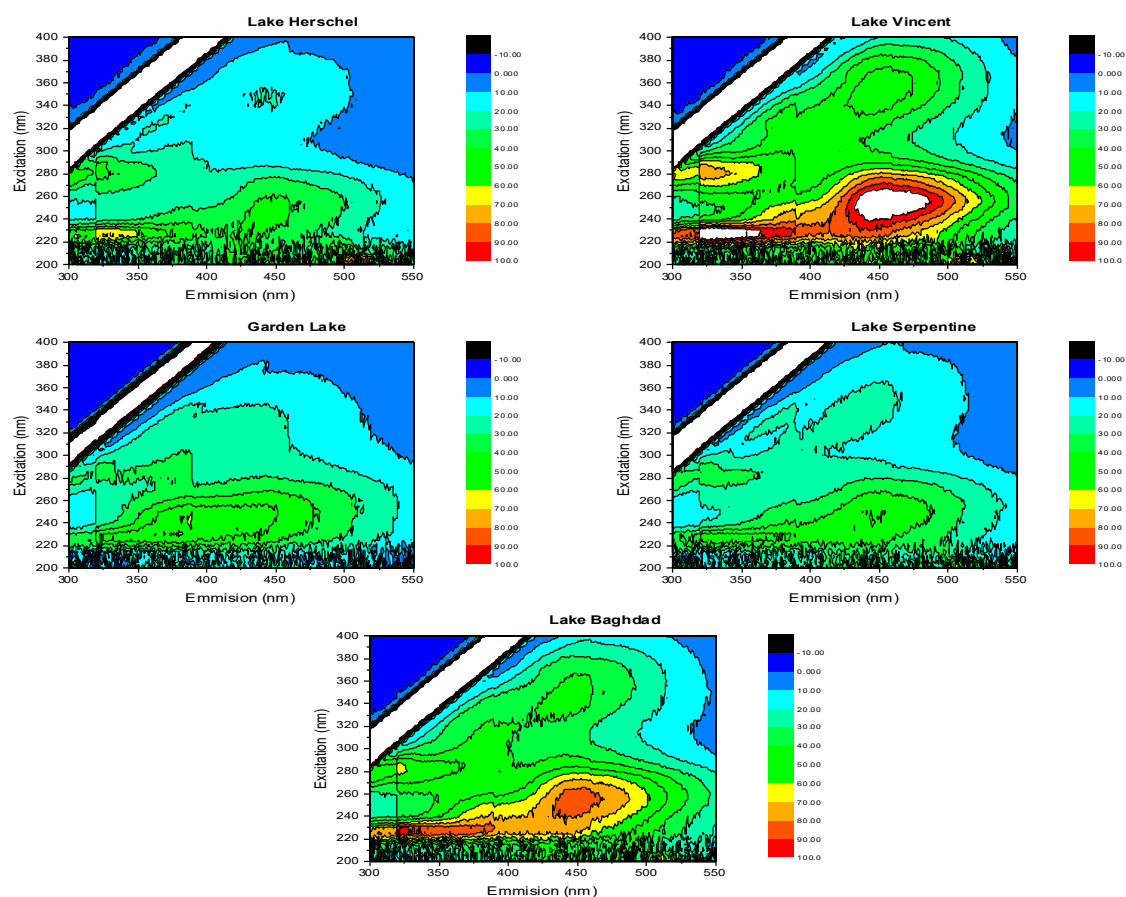

Figure S1. Comparison of the EEM spectra of the five lakes. Plots were performed with Origin 9.1 64 bit software.

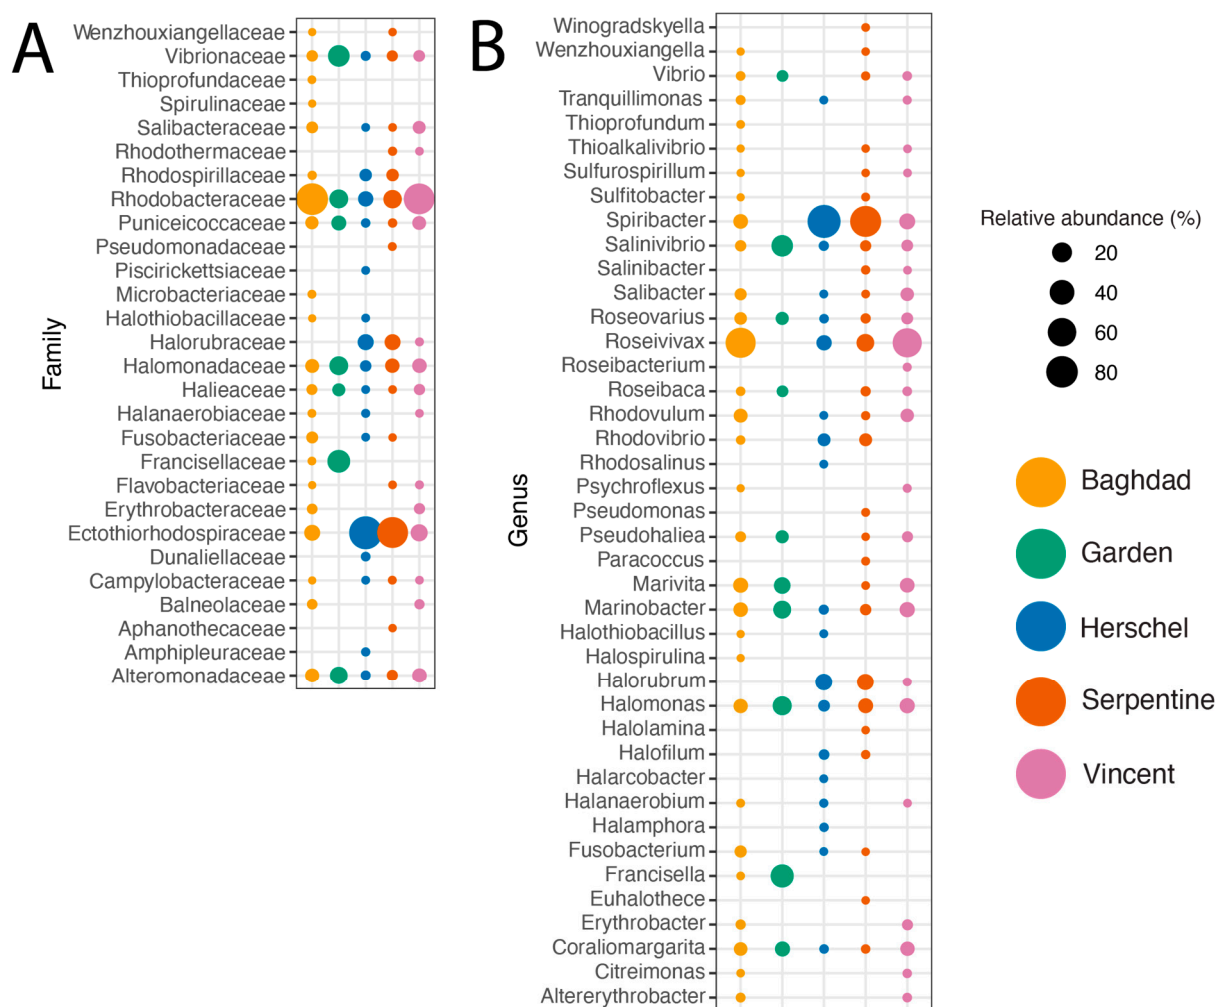

**Figure S2.** Distribution of the relative abundances at (A) family and (B) genus level across the five lake.

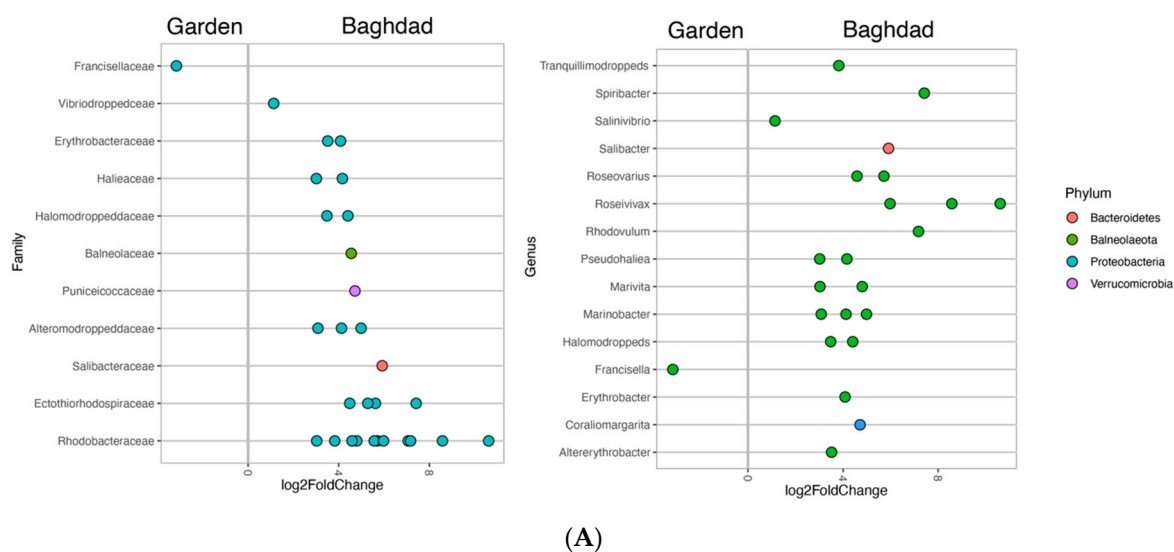

**(A)**

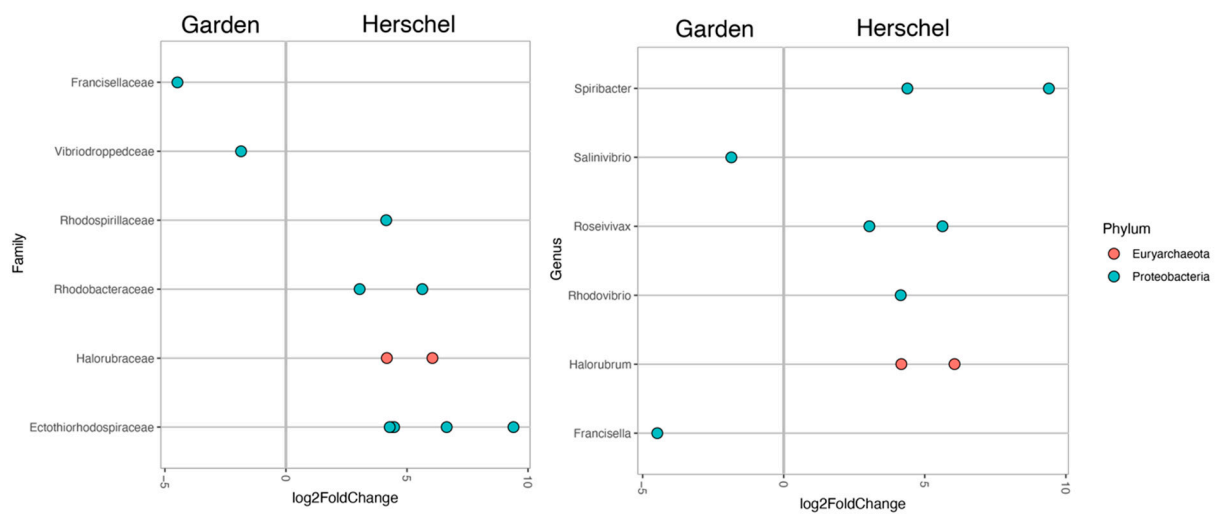

(B)

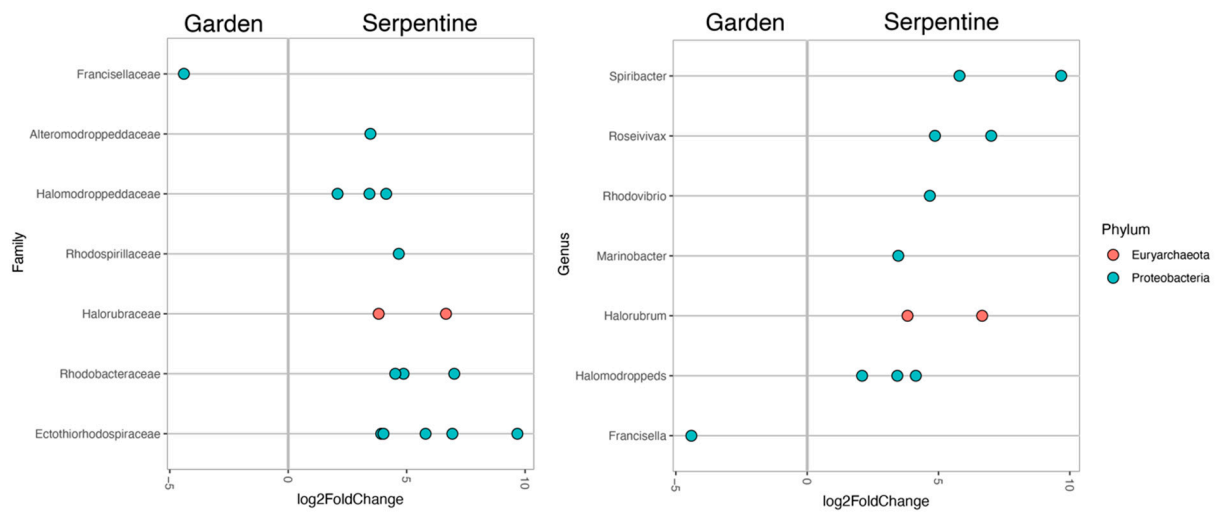

(C)

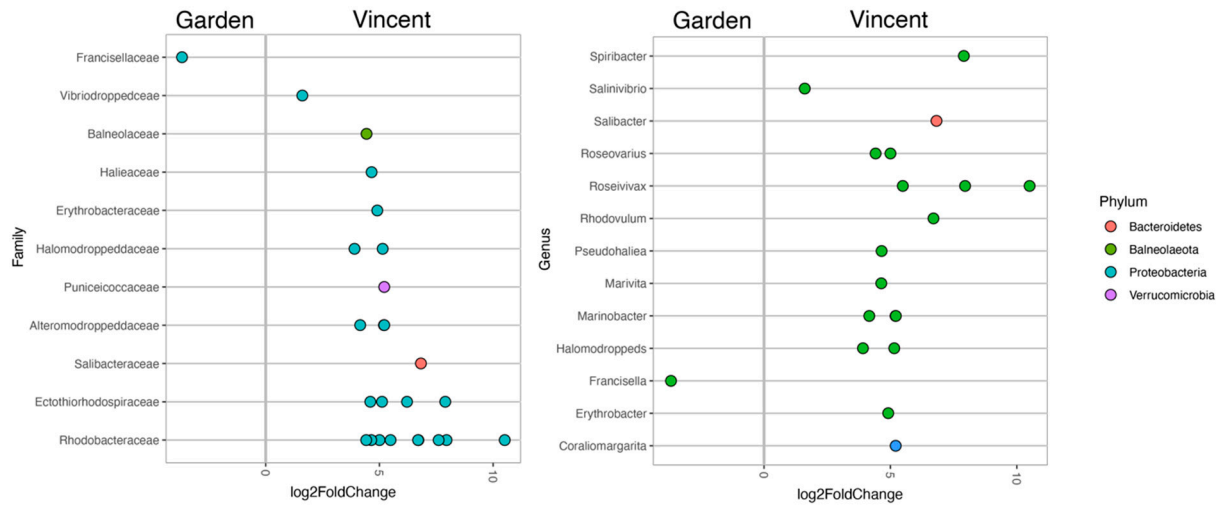

(D)

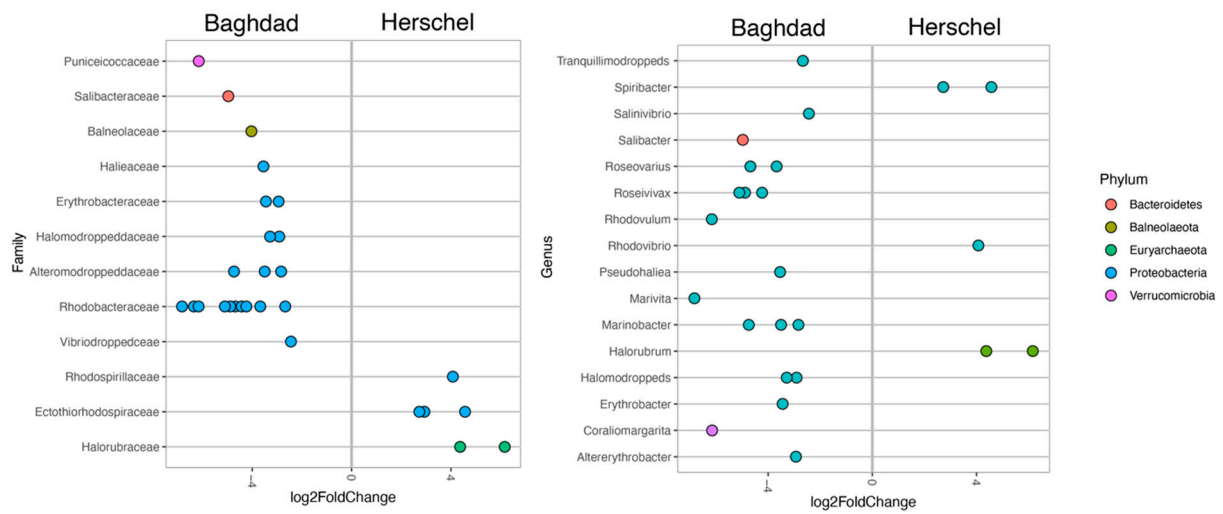

(E)

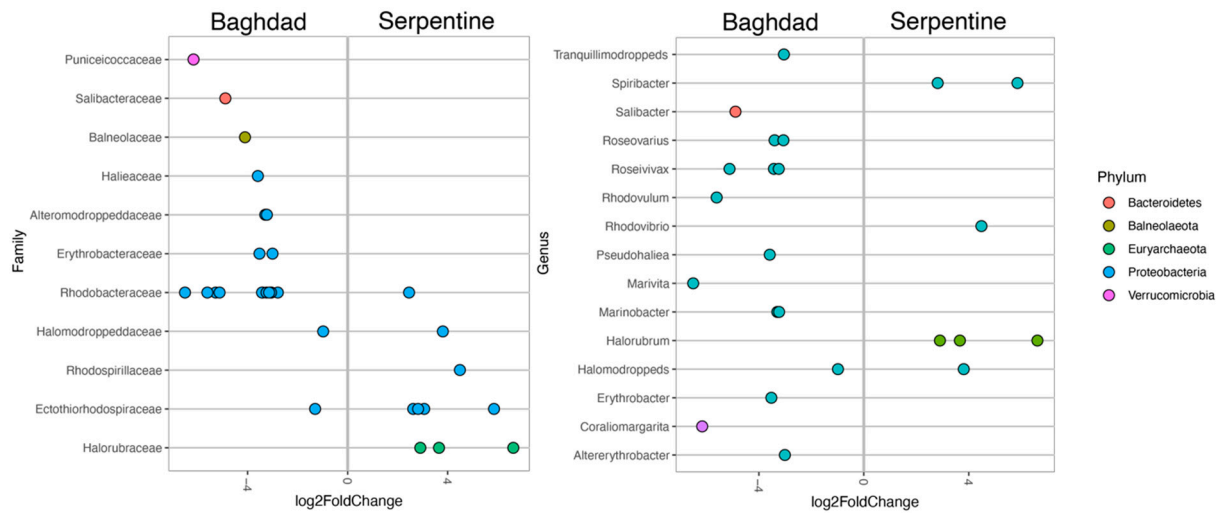

(F)

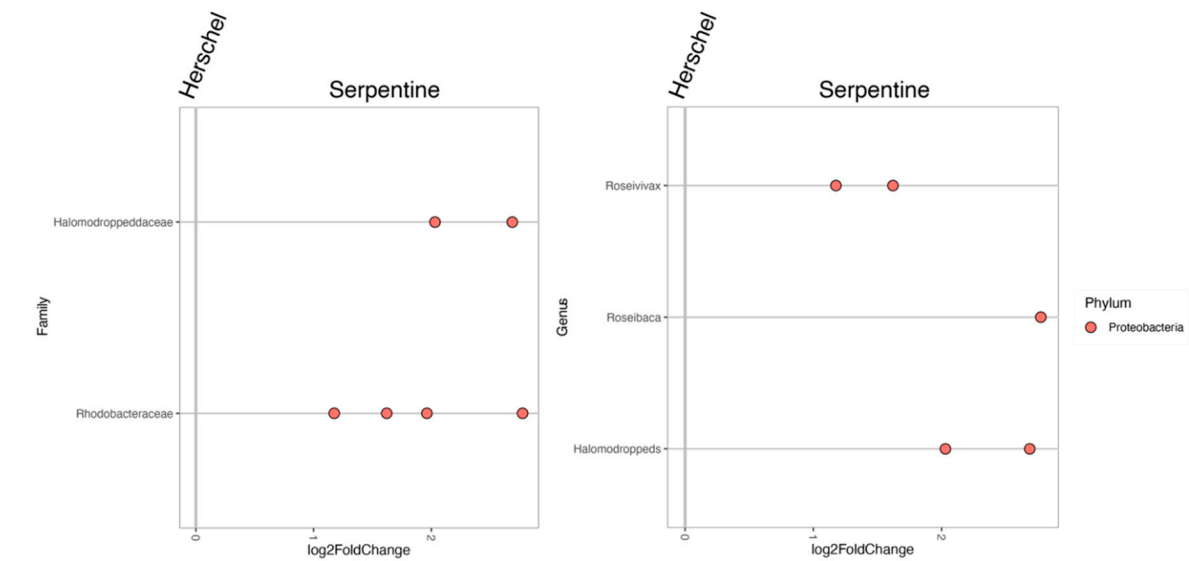

(G)



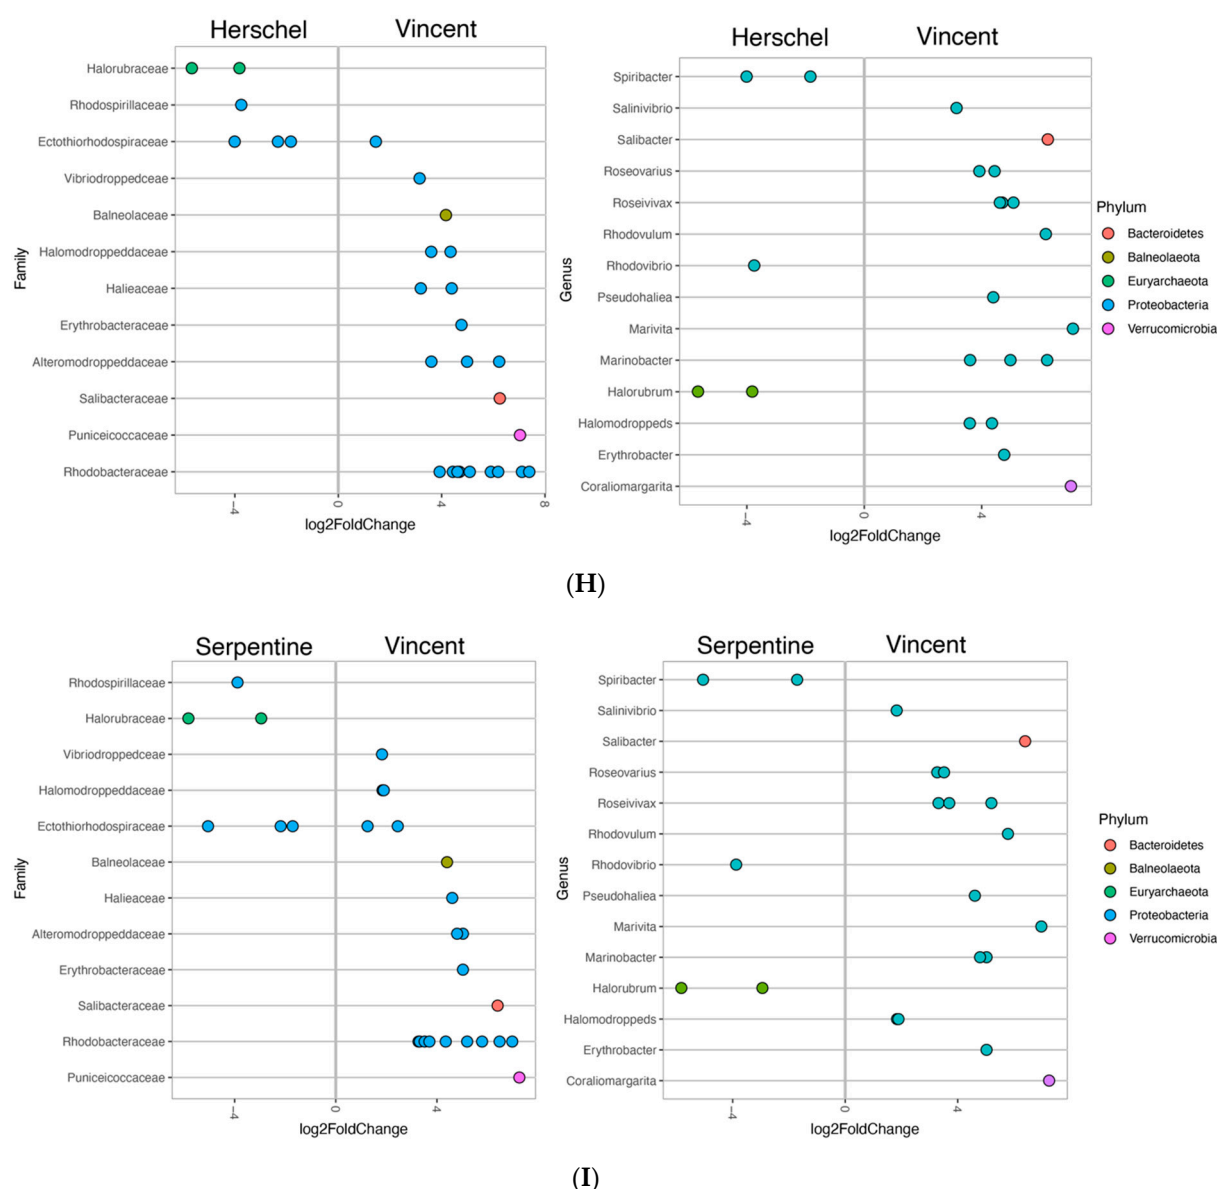

**Figure S3.** (A) Differentially abundant OTUs (agglomerated by species level) ( $p < 0.05$ ) between Garden Lake and Lake Baghdad at family and genus level. Negative log<sub>2</sub>-fold-change indicates taxa that were more abundant at Garden Lake, whereas a positive log<sub>2</sub>-fold-change indicates taxa that were more abundant at Lake Baghdad. Each circle represents one taxon that was enriched in one of the two lakes; different colours represent different phyla. (B) Differentially abundant OTUs (agglomerated by species level) ( $p < 0.05$ ) between Garden Lake and Herschel Lake at family and genus level. Negative log<sub>2</sub>-fold-change indicates taxa that were more abundant at Garden Lake, whereas a positive log<sub>2</sub>-fold-change indicates taxa that were more abundant at Herschel Lake. Each circle represents one taxon that was enriched in one of the two lakes; different colours represent different phyla. (C) Differentially abundant OTUs (agglomerated by species level) ( $p < 0.05$ ) between Garden Lake and Serpentine Lake at family and genus level. Negative log<sub>2</sub>-fold-change indicates taxa that were more abundant at Garden Lake, whereas a positive log<sub>2</sub>-fold-change indicates taxa that were more abundant at Serpentine Lake. Each circle represents one taxon that was enriched in one of the two lakes; different colours represent different phyla. (D) Differentially abundant OTUs (agglomerated by species level) ( $p < 0.05$ ) between Garden Lake and Lake Vincent at family and genus level. Negative log<sub>2</sub>-fold-change indicates taxa that were more abundant at Garden Lake, whereas a positive log<sub>2</sub>-fold-change indicates taxa that were more abundant at Lake Vincent. Each circle represents one taxon that was enriched in one of the two lakes; different colours represent different phyla. (E) Differentially abundant OTUs (agglomerated by species level) ( $p < 0.05$ ) between Lake Baghdad and Herschel Lake at family and genus level. Negative log<sub>2</sub>-fold-change indicates taxa that were more abundant at Lake Baghdad, whereas a positive log<sub>2</sub>-fold-change indicates taxa that were more abundant at Herschel Lake. Each circle represents one taxon that was enriched in one of the two lakes; different colours represent different phyla. (F) Differentially abundant OTUs (agglomerated by species level) ( $p < 0.05$ ) between Lake Baghdad and Serpentine Lake at family and genus level. Negative log<sub>2</sub>-fold-change indicates taxa

that were more abundant at Lake Baghdad, whereas a positive log<sub>2</sub>-fold-change indicates taxa that were more abundant at Serpentine Lake. Each circle represents one taxon that was enriched in one of the two lakes; different colours represent different phyla. **(G)** Differentially abundant OTUs (agglomerated by species level) ( $p < 0.05$ ) between Herschel Lake and Serpentine Lake at family and genus level. Negative log<sub>2</sub>-fold-change indicates taxa that were more abundant at Herschel Lake, whereas a positive log<sub>2</sub>-fold-change indicates phyla that were more abundant at Serpentine Lake. Each circle represents one taxon that was enriched in one of the two lakes; different colours represent different phyla. **(H)** Differentially abundant OTUs (agglomerated by species level) ( $p < 0.05$ ) between Herschel Lake and Lake Vincent at family and genus level. Negative log<sub>2</sub>-fold-change indicates taxa that were more abundant at Herschel Lake, whereas a positive log<sub>2</sub>-fold-change indicates taxa that were more abundant at Lake Vincent. Each circle represents one taxon that was enriched in one of the two lakes; different colours represent different phyla. **(I)** Differentially abundant OTUs (agglomerated by species level) ( $p < 0.05$ ) between Serpentine Lake and Lake Vincent at family and genus level. Negative log<sub>2</sub>-fold-change indicates taxa that were more abundant at Serpentine Lake, whereas a positive log<sub>2</sub>-fold-change indicates phyla that were more abundant at Lake Vincent. Each circle represents one taxon that was enriched in one of the two lakes; different colours represent different phyla.

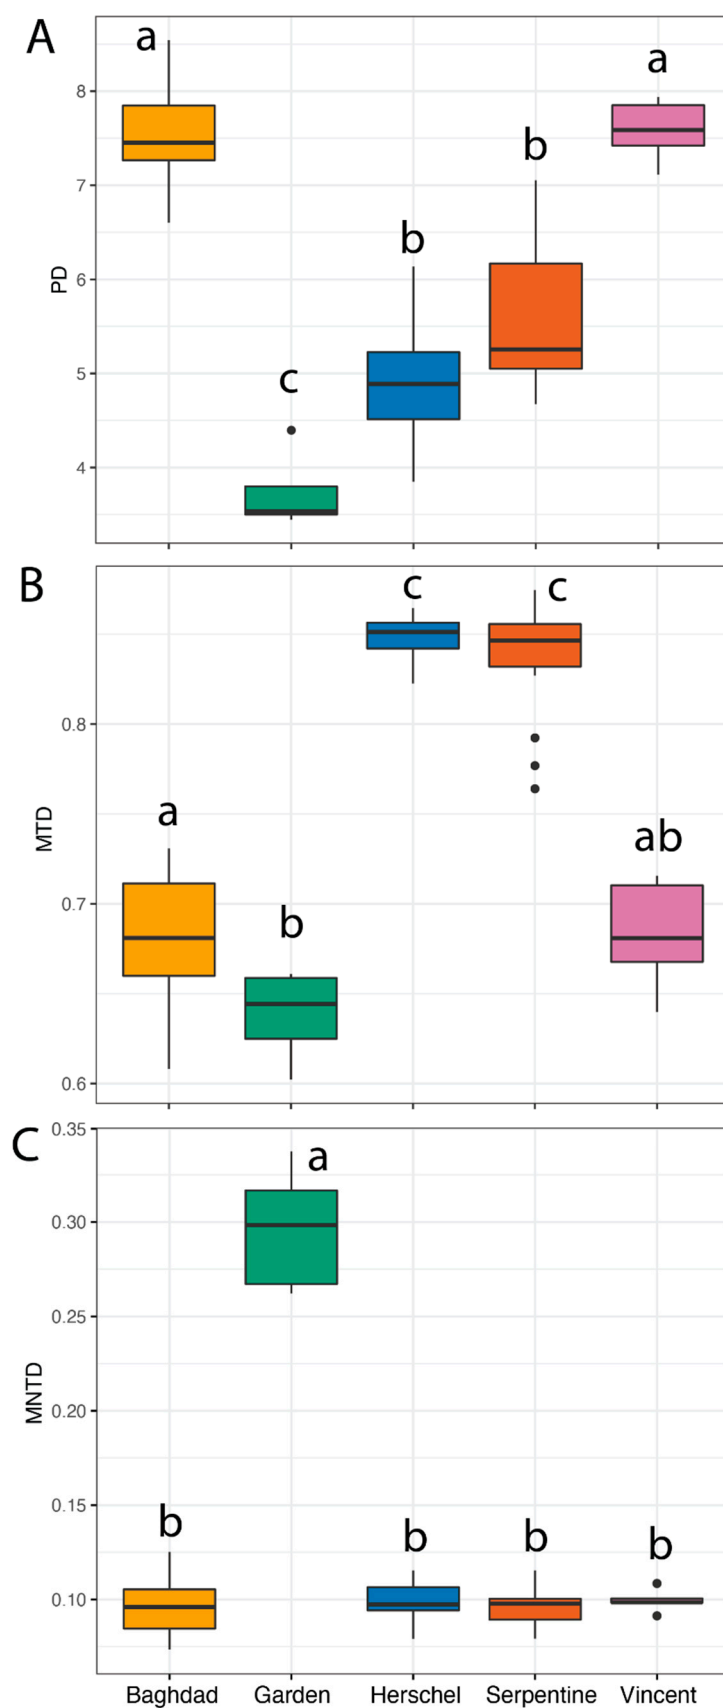

**Figure S4.** Phylogenetic analyses (A) Phylogenetic diversity (PD) between the microbial communities of the five lakes; (B) Mean pairwise distance distance (MTD) and (C) mean nearest taxon distance (MNTD). different letters (a, b, c) indicate statistically significant results (see Table S5 for the significances of the pairwise comparisons).
